# Supplementary material for: The Use of Botulinum Toxin in the Management of Hidradenitis Suppurativa: A Systematic Review
Source: PubMed Central journal article supplement — Plast Reconstr Surg Glob Open. 2022 Nov 18;10(11):e4660. doi: 10.1097/GOX.0000000000004660 (PMC9674480; doi:10.1097/gox.0000000000004660), 2022-11-18
Supplement: gox-10-e4660-s001.pdf [file gox-10-e4660-s001.pdf]

|   | Free text                                                                                                                                                                                                                                                                                                                                                                                                                                                                          | MESH                                                                                                                                                                                                                         |                                                                                                                                                                                                                      |                                                                                                                                                                                                            |
|---|------------------------------------------------------------------------------------------------------------------------------------------------------------------------------------------------------------------------------------------------------------------------------------------------------------------------------------------------------------------------------------------------------------------------------------------------------------------------------------|------------------------------------------------------------------------------------------------------------------------------------------------------------------------------------------------------------------------------|----------------------------------------------------------------------------------------------------------------------------------------------------------------------------------------------------------------------|------------------------------------------------------------------------------------------------------------------------------------------------------------------------------------------------------------|
|   |                                                                                                                                                                                                                                                                                                                                                                                                                                                                                    | Medline<br>*                                                                                                                                                                                                                 | EMBASE<br>*                                                                                                                                                                                                          | CENTRAL<br>*                                                                                                                                                                                               |
| P | <b>Hidradenitis suppurativa</b><br><b>OR</b><br>acne invers* OR<br>invers* acne OR<br>hidradeniti* suppurativ*<br>OR<br>suppurativ* hidradeniti*<br>OR<br>velpeau* disease OR<br>verneuil* disease OR<br>hidradenitis axillaris OR<br>sweat gland abscess OR<br>Apocrine acne OR<br>Hurley stage                                                                                                                                                                                   | [Hidradenitis Suppurativa]                                                                                                                                                                                                   | [suppurative hidradenitis]                                                                                                                                                                                           | [Hidradenitis Suppurativa]                                                                                                                                                                                 |
| I | Botulin* toxin OR<br>Botox OR<br>Xeomin OR<br>Dysport OR<br>Jeuveau OR<br>MyoBlock OR<br>NeuroBloc                                                                                                                                                                                                                                                                                                                                                                                 | [Botulinum toxins]                                                                                                                                                                                                           | [Botulinum toxins]                                                                                                                                                                                                   | [Botulinum toxins]                                                                                                                                                                                         |
| C | Antibiotic OR<br>Clindamycin OR<br>Tetracycline OR<br>Lymecycline OR<br>Doxycycline OR<br>Rifampicin OR<br>Dressing OR<br>Chlorhexidine OR<br>Retinoid OR<br>Infliximab OR<br>Adalimumab OR<br>Biologic OR<br>Surgery OR<br>Exision* OR<br>Flap OR<br>Reconstruction OR<br>Placebo OR<br>Laser OR<br>Light OR<br>Phototherapy OR<br>Alexandrite OR<br>Diode OR<br>Neodymium-doped<br>Yttrium-Aluminum-Garnet<br>OR<br>Nd YAG OR<br>Pulse light OR<br>Carbon dioxide OR<br>Ablative | [anti-bacterial agents]<br>[biological dressings]<br><br>[retinoids]<br>[Biological therapy]<br>[immunomodulation]<br>[reconstructive surgical<br>procedures]<br><br>[Placebos]<br><br>[Laser Therapy]<br><br>[Phototherapy] | [anti-bacterial agents]<br>[biological dressings]<br><br>[retinoids]<br>[Biological therapy]<br>[immunomodulation]<br>[reconstructive surgical<br>procedures]<br><br>[Placebos]<br><br>[Laser]<br><br>[Phototherapy] | [anti-bacterial agents]<br>[biological dressings]<br><br>[retinoids]<br>[Biological therapy]<br>[immunomodulation]<br>[reconstructive surgical<br>procedures]<br><br>[Laser Therapy]<br><br>[Phototherapy] |

## **OpenGrey**

### **Hidradenitis suppurativa OR**

acne invers\* OR  
invers\* acne OR  
hidradeniti\* suppurativ\* OR  
suppurativ\* hidradeniti\* OR  
velpeau\* disease OR  
verneuil\* disease OR  
hidradenitis axillaris OR  
sweat gland abscess OR  
Apocrine acne OR  
Hurley stage

## **JAN 2021**

EMBASE: 2619  
Medline: 1105  
CENTRAL: 320 (209 trials)  
Open grey: 7

Duplicates 947

Excluded  
Wrong design 5  
No data 1

## **2021- 2022**

Medline 218  
EMBASE 554  
Central 48 (36 trials)  
Open grey 0
