# Supplementary material for: The Use of Botulinum Toxin in the Management of Hidradenitis Suppurativa: A Systematic Review
Source: PubMed Central journal article supplement — Plast Reconstr Surg Glob Open. 2022 Nov 18;10(11):e4660. doi: 10.1097/GOX.0000000000004660 (PMC9674480; doi:10.1097/gox.0000000000004660), 2022-11-18
Supplement: gox-10-e4660-s002.pdf [file gox-10-e4660-s002.pdf]

## Risk of bias domains

|                        | D1                                                                                | D2                                                                                  | D3                                                                                  | D4                                                                                  | D5                                                                                  | Overall                                                                             |
|------------------------|-----------------------------------------------------------------------------------|-------------------------------------------------------------------------------------|-------------------------------------------------------------------------------------|-------------------------------------------------------------------------------------|-------------------------------------------------------------------------------------|-------------------------------------------------------------------------------------|
| Study<br>Grimstad 2020 |  |  |  |  |  |  |

## Domains:

D1: Bias arising from the randomization process.

D2: Bias due to deviations from intended intervention.

D3: Bias due to missing outcome data.

D4: Bias in measurement of the outcome.

D5: Bias in selection of the reported result.

## Judgement

 High

 Low
