# Supplementary material for: The Use of Botulinum Toxin in the Management of Hidradenitis Suppurativa: A Systematic Review
Source: PubMed Central journal article supplement — Plast Reconstr Surg Glob Open. 2022 Nov 18;10(11):e4660. doi: 10.1097/GOX.0000000000004660 (PMC9674480; doi:10.1097/gox.0000000000004660), 2022-11-18
Supplement: gox-10-e4660-s003.pdf [file gox-10-e4660-s003.pdf]

| Reference                 | Study type               | Number of patients (n male) | Anatomic location (%)                                                            | Hurley stage (%)                | Intervention (comparator)                             | Dose                                                                                                   | Comparator                                                                 | Outcomes                                                                                                                                                                                                                                                                                                                                                                                                                                                                                                                                                                                                                                                                                                                                                                                                                                                                                                                                                                                                                                                                                                                                                                                                                                                                                                                                                                                                                                |
|---------------------------|--------------------------|-----------------------------|----------------------------------------------------------------------------------|---------------------------------|-------------------------------------------------------|--------------------------------------------------------------------------------------------------------|----------------------------------------------------------------------------|-----------------------------------------------------------------------------------------------------------------------------------------------------------------------------------------------------------------------------------------------------------------------------------------------------------------------------------------------------------------------------------------------------------------------------------------------------------------------------------------------------------------------------------------------------------------------------------------------------------------------------------------------------------------------------------------------------------------------------------------------------------------------------------------------------------------------------------------------------------------------------------------------------------------------------------------------------------------------------------------------------------------------------------------------------------------------------------------------------------------------------------------------------------------------------------------------------------------------------------------------------------------------------------------------------------------------------------------------------------------------------------------------------------------------------------------|
| O' Reilly et al 2005 (17) | Case report              | 1 (0)                       | Axillary                                                                         | Not reported                    | Botulinum Toxin A                                     | 250 units per axilla                                                                                   | N/A                                                                        | Complete resolution of symptoms for 10 months                                                                                                                                                                                                                                                                                                                                                                                                                                                                                                                                                                                                                                                                                                                                                                                                                                                                                                                                                                                                                                                                                                                                                                                                                                                                                                                                                                                           |
| Grimstad et al 2020 (26)  | Randomised control trial | 20 (3)                      | Axillary (25%)<br>Axillary + groin (5%)<br>Groin (40%)<br>Groin + perineum (30%) | I (70%)<br>II (25%)<br>III (5%) | Botulinum toxin type B given at baseline and 3 months | Total dose per treatment area: 150 units per armpit, 200 units per groin and 600 units in the perineum | Saline placebo given at baseline, botulinum toxin type B given at 3 months | <p>Primary outcome measure</p> <p>Botox arm: DLQI score improved from median of 17 (10-21) to 8 (0-22) at 3 months (p&lt; 0.05)</p> <p>Control arm: DLQI score improved from a median of 13.5 (2-21) to 11 (1-20) at 3 months (p &gt; 0.05)</p> <p>Median DLQI score significantly decreased in cohort 2 from 3-6 months (11 vs 6.5, p&lt; 0.01)</p> <p>Secondary outcome measures</p> <p>Perceived hidradenitis related impairment (VAS)</p> <p>Botox arm: Significant improvement in VAS score at three months (8 vs 3.5, p&lt;0.01). Median VAS score of 7 at 6 months.</p> <p>Control arm: No significant difference in VAS score at 3 months (6 vs 5.5, p&gt; 0.05)</p> <p>Number of nodules</p> <p>Botox arm: Significant reduction at 3 months (7.5 vs 3.5, p&lt;0.01) and 6 months (7.5 vs 2, p&lt;0.05)</p> <p>Control arm: No significant difference at 3 months (6 vs 2, p&gt;0.05), significant reduction at 6 months (6 vs 1, p&lt;0.05)</p> <p>Total number of lesions</p> <p>Botox arm: Significant reduction at 3 (9 vs 4, p&lt;0.01) and 6 months (9 vs 2, p&lt;0.01)</p> <p>Control arm: No significant difference at 3 months (6 vs 4.5, p&gt;0.05), significant reduction at 6 months (6 vs 2, p&lt;0.05)</p> <p>Self-reported pain in worse lesion (VAS)</p> <p>Botox arm Significant reduction at 6 months (8 vs 5, p&lt;0.05)</p> <p>Control arm: No significant reduction at 6 months (7 vs 6.5, p&gt;0.05)</p> |

|                                 |             |       |                           |              |                   |                                                             |     |                                                                                                                                           |
|---------------------------------|-------------|-------|---------------------------|--------------|-------------------|-------------------------------------------------------------|-----|-------------------------------------------------------------------------------------------------------------------------------------------|
| Feito-Rodriguez et al 2009 (27) | Case report | 1 (0) | Groin                     | Not reported | Botulinum toxin-A | 40 units                                                    | N/A | Complete remission for 6 months. Recurrence at 6 months.                                                                                  |
| Shi et al 2019 (28)             | Case report | 1 (0) | Axillary and inframammary | III          | Botulinum toxin-A | 400 units                                                   | N/A | Resolution of inflammation and healing of sinus tracts. 50% reduction in pain.                                                            |
| Campanati et al 2019 (29)       | Case series | 2 (1) | Axillary<br>Groin         | II<br>II     | Botulinum toxin-A | 50 units each axilla<br>200 units total                     | N/A | 'Real improvement' at 3 and 6 months. Patient 1 had repeat intervention at 10 months. No pain or difficulty in movement for both patients |
| Khoo et al 2014 (30)            | Case report | 1 (0) | Axillary                  | II           | Botulinum toxin-A | 25 units each axilla (four treatment courses over one year) | N/A | Disease remission sustained at 1 year follow up after fourth treatment                                                                    |

**Supplementary Digital Content 2: Summary table of included studies**
